# Supplementary material
Source: publisher figshare collection journal article supplement (https://sage.figshare.com/ndownloader/files/14884118)
Supplement: Supplementary file 1 [file 14884118]

## Supplemental Material

Table 4 Percentages of participants achieving the three motor milestones after the two-week intervention and the two-week follow-up after intervention in each group.

| Time                                           | Milestone      |        | TENS+SR(1)<br>number (%) | NMES+SR(2)<br>number (%) | SR(3)<br>number (%) | P-value             | 1 vs 3             | 2 vs 3             | 1 vs 2 |
|------------------------------------------------|----------------|--------|--------------------------|--------------------------|---------------------|---------------------|--------------------|--------------------|--------|
| two-week<br>post<br>intervention               | sitting >5mins | able   | 12 (92.3%)               | 11 (84.6%)               | 9 (64.3%)           | 0.222 <sup>a</sup>  | 0.013 <sup>*</sup> | 0.033 <sup>*</sup> | 0.695  |
|                                                |                | unable | 1 (7.7%)                 | 2 (15.4%)                | 5 (35.7%)           |                     |                    |                    |        |
|                                                | standing >1min | able   | 9 (69.2%)                | 6 (46.2%)                | 5 (35.7%)           | 0.242 <sup>b</sup>  |                    |                    |        |
|                                                |                | unable | 4 (30.8%)                | 7 (53.8%)                | 9 (64.3%)           |                     |                    |                    |        |
|                                                | walking ≥50m   | able   | 7 (53.8%)                | 6 (46.2%)                | 1 (7.1%)            | 0.018 <sup>a*</sup> |                    |                    |        |
|                                                |                | unable | 6 (46.2%)                | 7 (53.8%)                | 13 (92.9%)          |                     |                    |                    |        |
| two-week<br>follow-up<br>after<br>intervention | sitting >5mins | able   | 13 (100%)                | 13 (100%)                | 12 (85.7%)          | 0.317 <sup>a</sup>  |                    |                    |        |
|                                                |                | unable | 0 (0%)                   | 0 (0%)                   | 2 (14.3%)           |                     |                    |                    |        |
|                                                | standing >1min | able   | 13 (100%)                | 10 (76.9%)               | 10 (71.4%)          | 0.155 <sup>a</sup>  |                    |                    |        |
|                                                |                | unable | 0 (0%)                   | 3 (23.1%)                | 4 (28.6%)           |                     |                    |                    |        |
|                                                | walking ≥50m   | able   | 11 (84.6%)               | 8 (61.5%)                | 5 (35.7%)           | 0.034 <sup>b*</sup> |                    |                    |        |
|                                                |                | unable | 2 (15.4%)                | 5 (38.5%)                | 9 (64.3%)           |                     |                    |                    |        |

TENS: transcutaneous nerve stimulation; NMES: neuromuscular electrical stimulation

SR: standard rehabilitation;

a: using a Fisher's exact test

b: using a Pearson's chi-square test

“\*” indicates  $p < 0.05$ .
